# Supplementary material for: Comparative HPLC–DAD–ESI-QTOF/MS/MS Analysis of Bioactive Phenolic Compounds Content in the Methanolic Extracts from Flowering Herbs of Monarda Species and Their Free Radical Scavenging and Antimicrobial Activities
Source: MDPI journal article supplement (doi:10.3390/pharmaceutics15030964), 2023-03-16

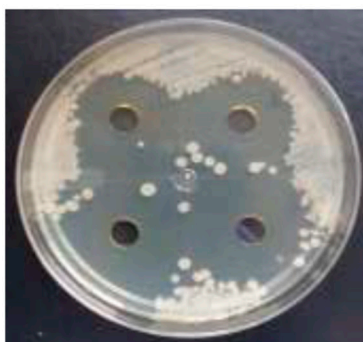

a) *Bacillus subtilis*  
ATCC 6633

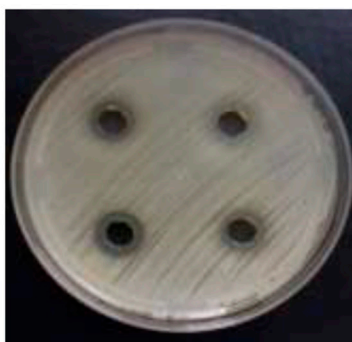

b) *Staphylococcus aureus*  
ATCC 29213

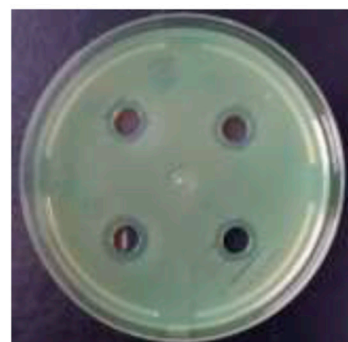

c) *Pseudomonas aeruginosa*  
ATCC 27853

**Figure S1.** Antimicrobial activity of 70% (v/v) methanolic extracts of *Monarda* species assessed by diffusion method based on growth inhibition zone diameters for the selected bacterial species.

**Table S1.** Fragmentation data of the tentatively identified components for polyphenolic compounds identified in 70% (v / v) MeOH in extracts of tested species of *Monarda* L.

|                               |                                                                                                                                                                                                                                                                                                                                                                                                                                                                                                   |
|-------------------------------|---------------------------------------------------------------------------------------------------------------------------------------------------------------------------------------------------------------------------------------------------------------------------------------------------------------------------------------------------------------------------------------------------------------------------------------------------------------------------------------------------|
| gallic acid                   | 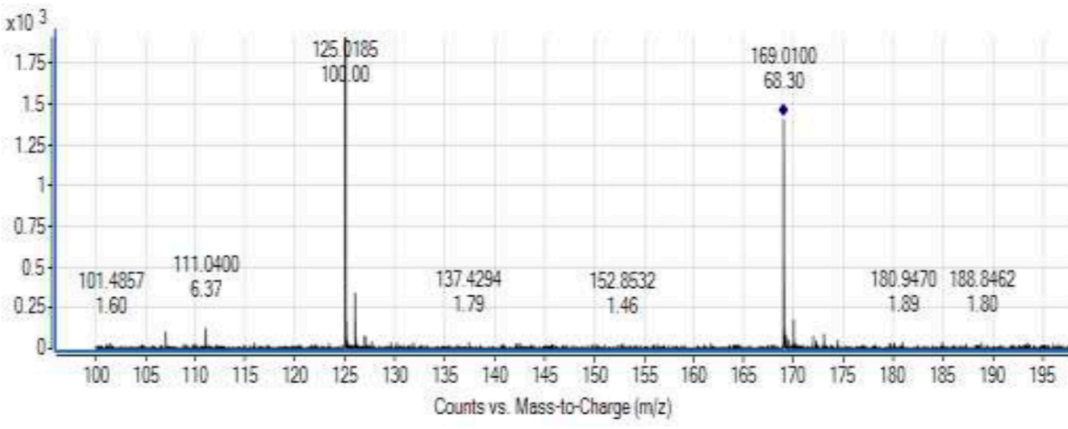 <p>Mass spectrum of gallic acid. The x-axis represents mass-to-charge ratio (m/z) from 100 to 195. The y-axis represents relative intensity (x10<sup>3</sup>) from 0 to 1.75. The base peak is at m/z 125.0185 (100.00). Other labeled peaks include m/z 101.4857 (1.60), 111.0400 (6.37), 137.4294 (1.79), 152.8532 (1.46), 169.0100 (68.30), 180.9470 (1.89), and 188.8462 (1.80).</p>                       |
| protocatechuic acid           |  <p>Mass spectrum of protocatechuic acid. The x-axis represents mass-to-charge ratio (m/z) from 100 to 154. The y-axis represents relative intensity (x10<sup>3</sup>) from 0 to 1.2. The base peak is at m/z 109.0279 (100.00). Other labeled peaks include m/z 101.1714 (1.52), 117.0174 (0.90), 123.0415 (8.03), 139.2392 (1.14), 148.1190 (0.92), and 153.0217 (37.44).</p>                                |
| hydroxybenzoic acid glucoside |  <p>Mass spectrum of hydroxybenzoic acid glucoside. The x-axis represents mass-to-charge ratio (m/z) from 100 to 1000. The y-axis represents relative intensity (x10<sup>3</sup>) from 0 to 1.75. The base peak is at m/z 299.0827 (100.00). Other labeled peaks include m/z 137.0252 (78.39), 179.0318 (35.83), 338.9070 (9.69), 417.9081 (2.37), 569.3519 (3.06), 745.2939 (3.58), and 978.7847 (4.26).</p> |

|                           |                                                                                                                                                                                                                                                                                                                                                                                                                                                                                                                                       |
|---------------------------|---------------------------------------------------------------------------------------------------------------------------------------------------------------------------------------------------------------------------------------------------------------------------------------------------------------------------------------------------------------------------------------------------------------------------------------------------------------------------------------------------------------------------------------|
| <i>p</i> -OH-benzoic acid | 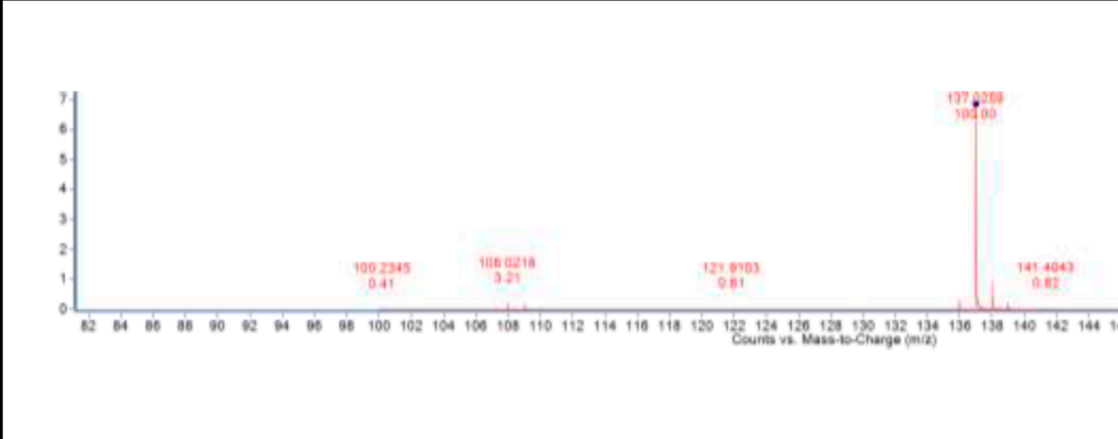 <p>Mass spectrum of <i>p</i>-OH-benzoic acid. The x-axis represents m/z from 82 to 144, and the y-axis represents relative intensity from 0 to 7. The base peak is at m/z 137.0289 (100.00). Other labeled peaks include m/z 100.2345 (0.41), 108.0218 (3.21), 121.9103 (0.81), and 141.4043 (0.82).</p>                                                                                                                                           |
| chlorogenic acid          |  <p>Mass spectrum of chlorogenic acid. The x-axis represents m/z from 130 to 360, and the y-axis represents relative intensity from 0 to 2.5 (x10<sup>3</sup>). The base peak is at m/z 353.0659 (100.00). Other labeled peaks include m/z 136.0454 (9.97), 161.0225 (3.11), 173.0405 (3.37), 179.0339 (38.59), 191.0532 (84.76), 217.3804 (1.36), 265.0233 (1.97), 277.4524 (1.88), 294.0818 (1.50), 317.0213 (1.80), and 330.9018 (1.15).</p>    |
| coumarylquinic acid       |  <p>Mass spectrum of coumarylquinic acid. The x-axis represents m/z from 150 to 340, and the y-axis represents relative intensity from 0 to 2.5 (x10<sup>3</sup>). The base peak is at m/z 163.0414 (100.00). Other labeled peaks include m/z 156.0335 (2.89), 173.0484 (1.85), 191.0590 (9.98), 207.0780 (1.32), 224.2305 (0.83), 251.0499 (0.99), 264.7313 (0.75), 288.2159 (1.67), 307.0144 (2.37), 322.2308 (0.80), and 337.0962 (23.63).</p> |
| <i>p</i> -coumaric acid   |  <p>Mass spectrum of <i>p</i>-coumaric acid. The x-axis represents m/z from 108 to 164, and the y-axis represents relative intensity from 0 to 3 (x10<sup>3</sup>). The base peak is at m/z 119.0480 (100.00). Other labeled peaks include m/z 113.7275 (1.76), 121.0711 (13.90), 136.0794 (3.90), 147.0827 (13.13), 152.1108 (1.78), 155.7994 (2.31), and 163.0369 (45.19).</p>                                                                  |

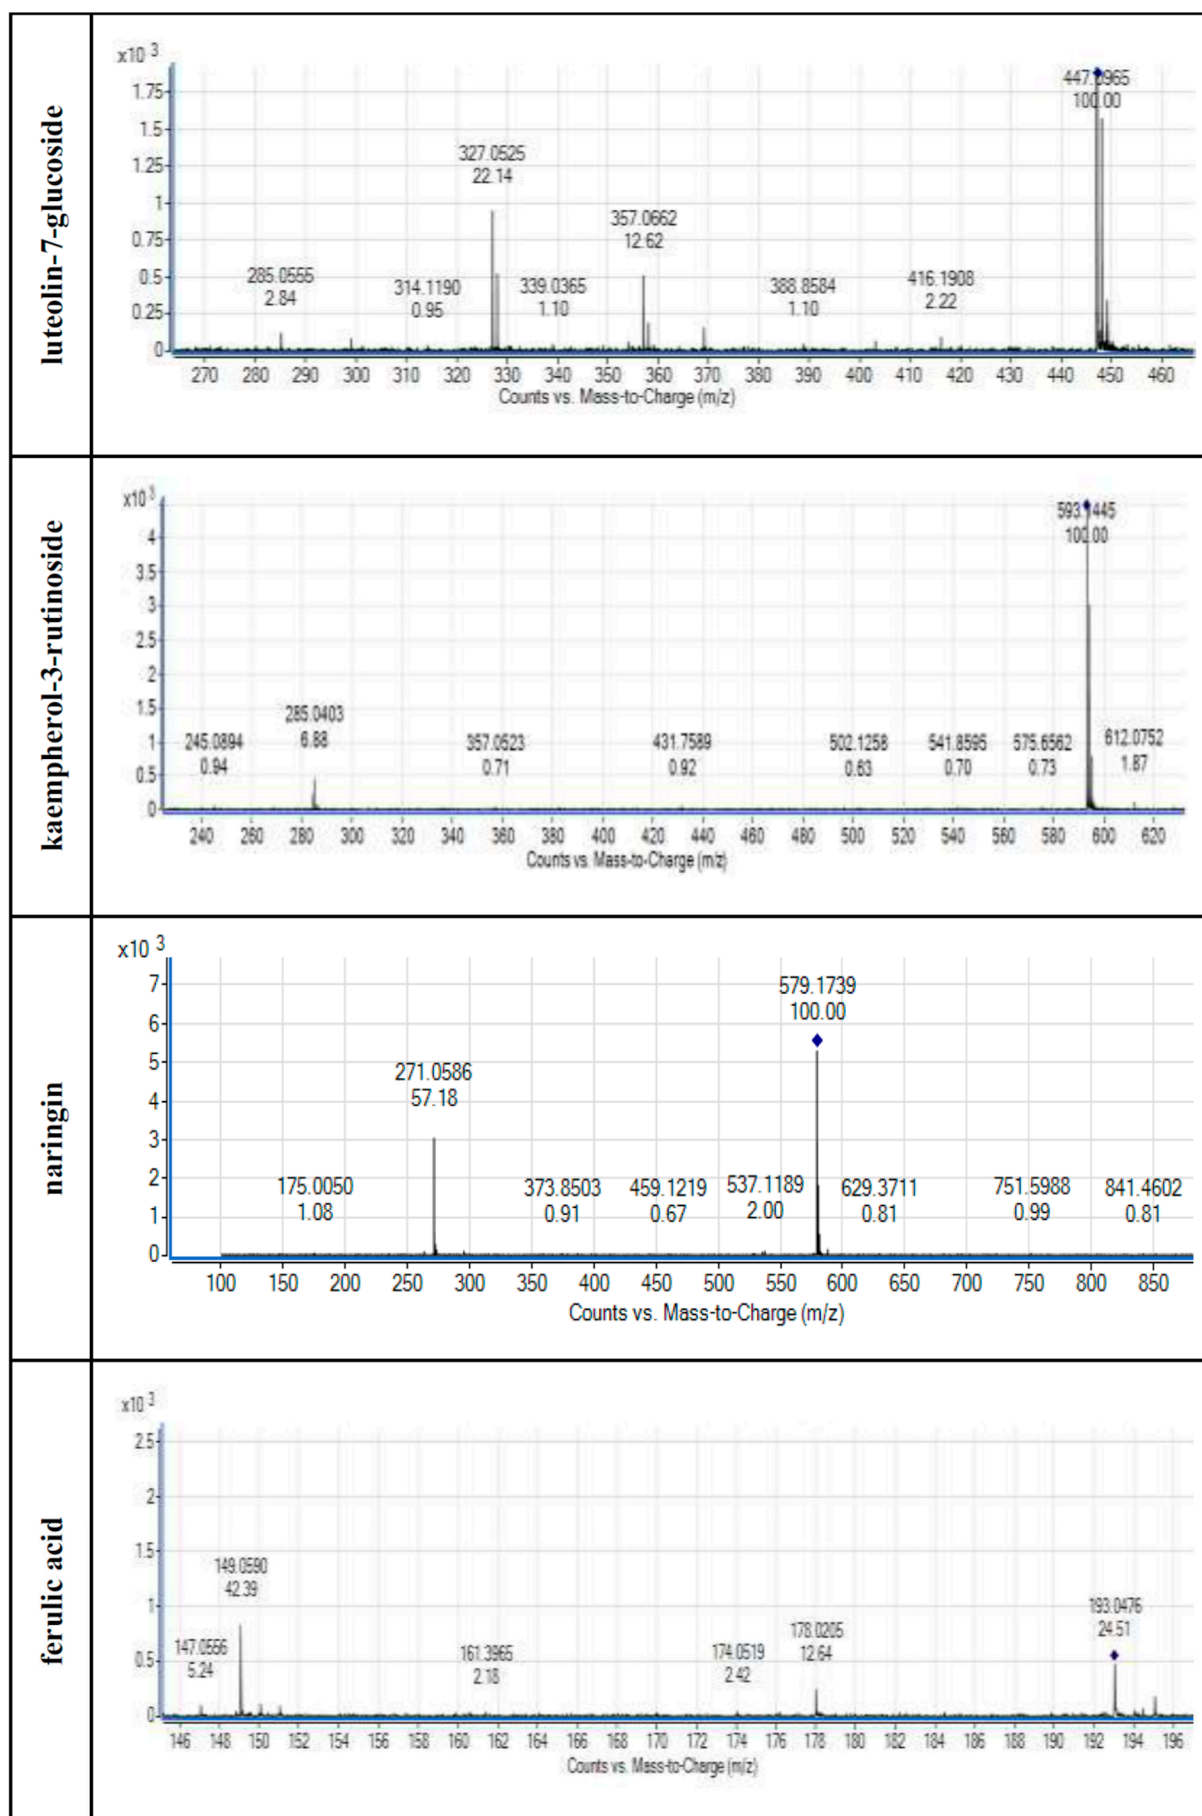

**Table S2.** Mass chromatogram of the total extract TIC together with ion chromatograms of all identified phenolic acids in the tested species of *Monarda* L.

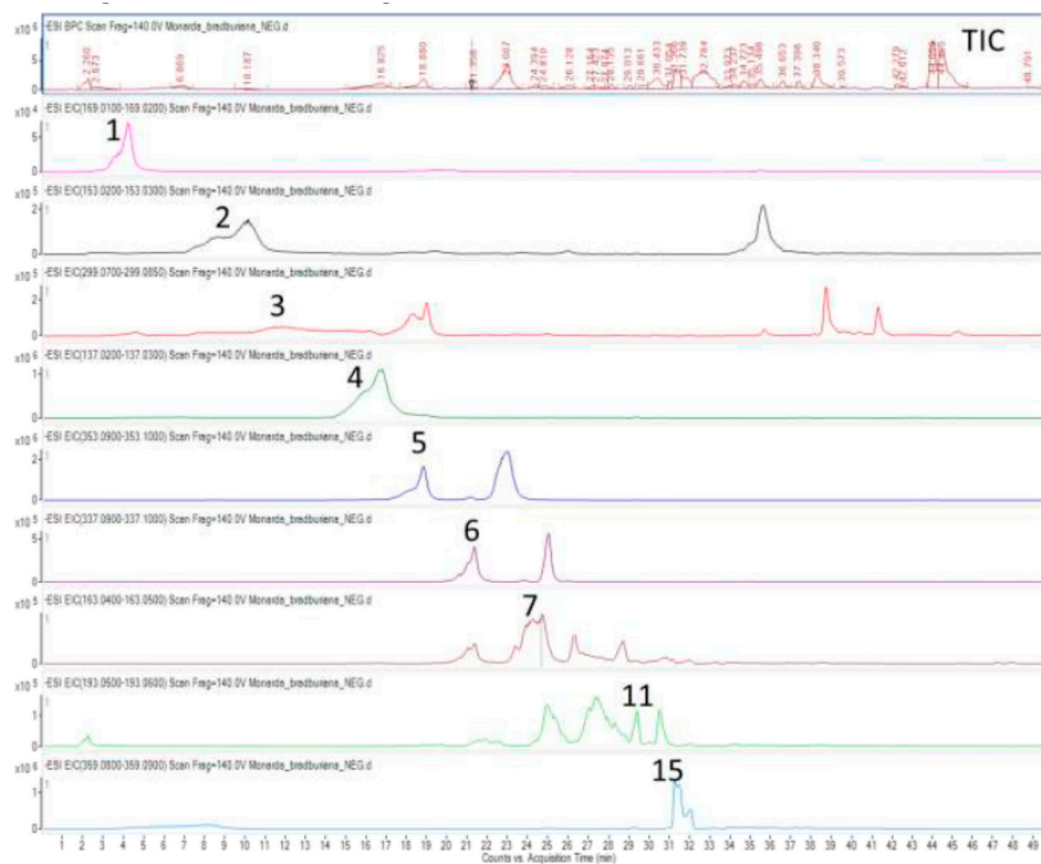

Supplement: s1 [file s1]
